# Supplementary material for: Has aidi injection the attenuation and synergistic efficacy to gemcitabine and cisplatin in non-small cell lung cancer? A meta-analysis of 36 randomized controlled trials
Source: PubMed Central journal article supplement (PMC5352058; doi:10.18632/oncotarget.13617), 2016-11-25
Supplement: oncotarget-08-1329-s001.pdf [file oncotarget-08-1329-s001.pdf]

# Has aidi injection the attenuation and synergistic efficacy to gemcitabine and cisplatin in non-small cell lung cancer? A meta-analysis of 36 randomized controlled trials

## SUPPLEMENTARY FIGURES

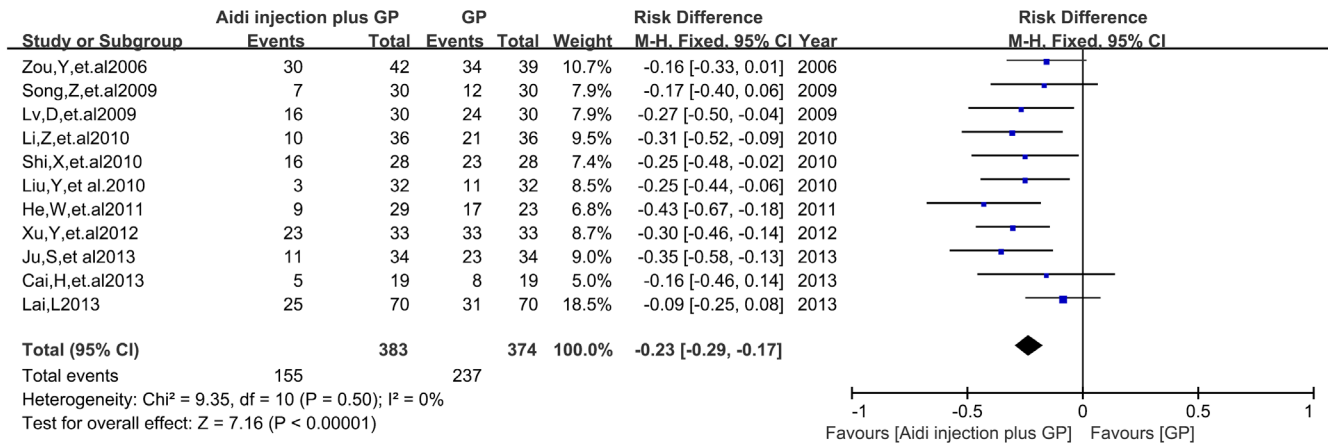

Supplementary Figure S1: The analysis of myelosuppression between two groups.

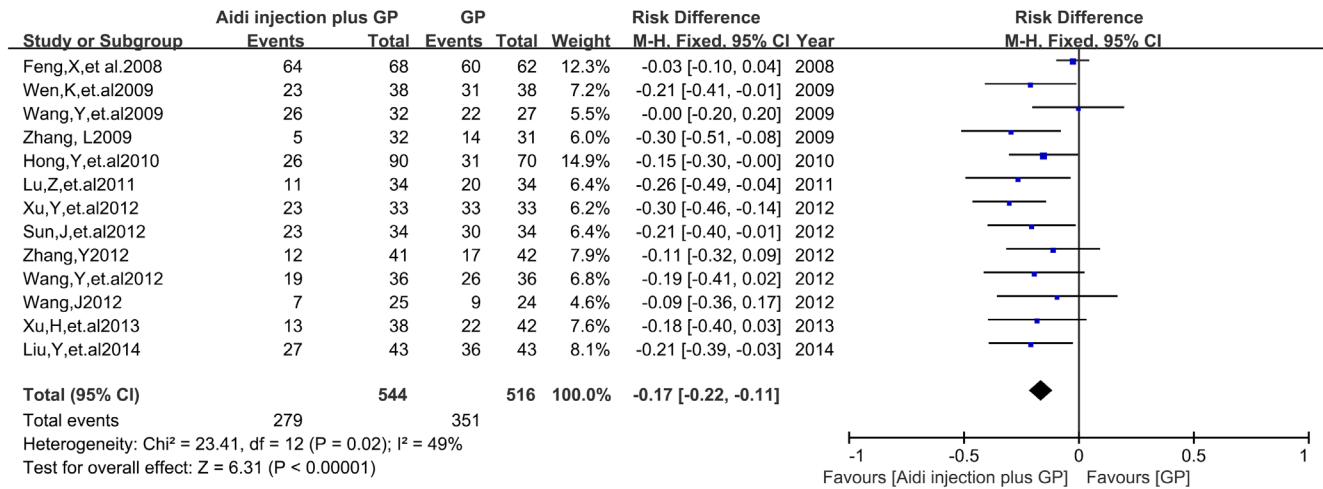

Supplementary Figure S2: The analysis of neutropenia between two groups.

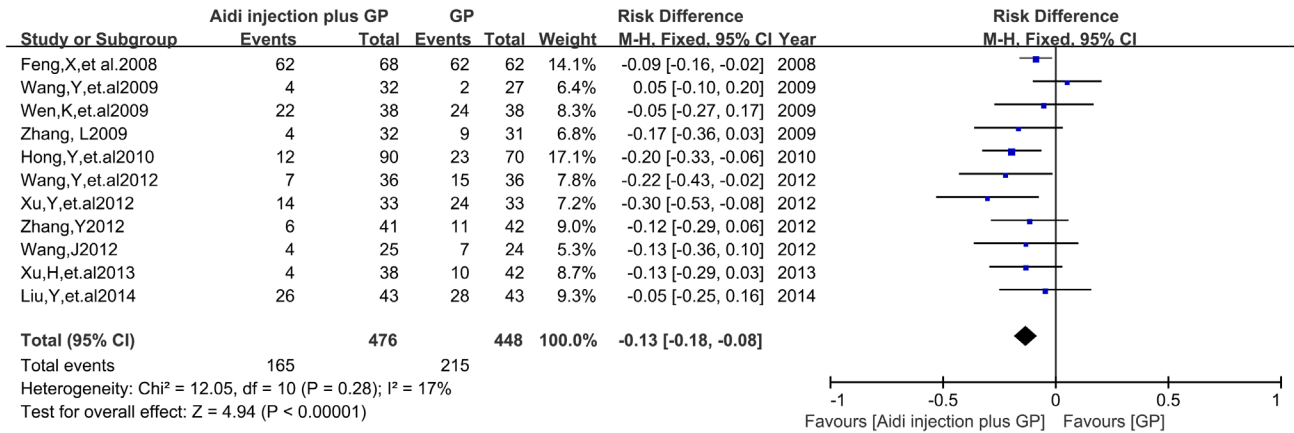

Supplementary Figure S3: The analysis of thrombocytopenia between two groups.

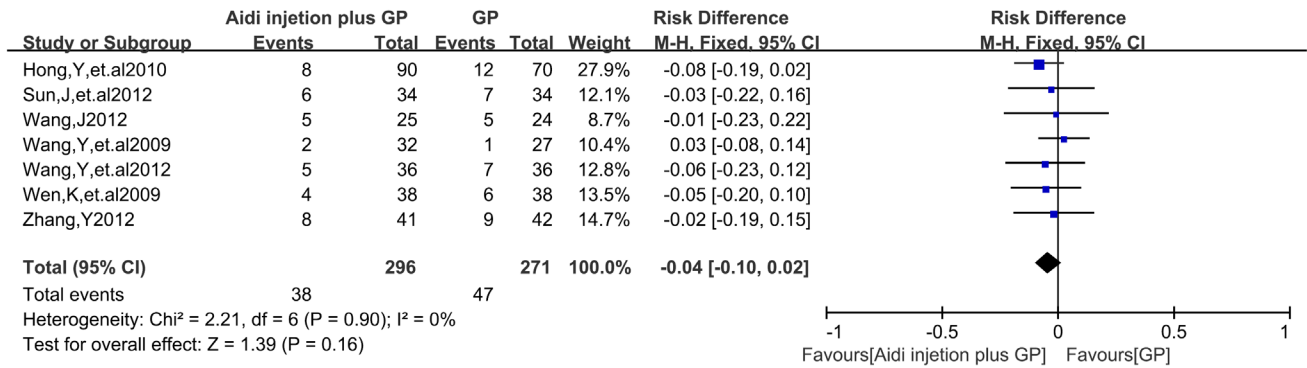

Supplementary Figure S4: The analysis of liver injury between two groups.

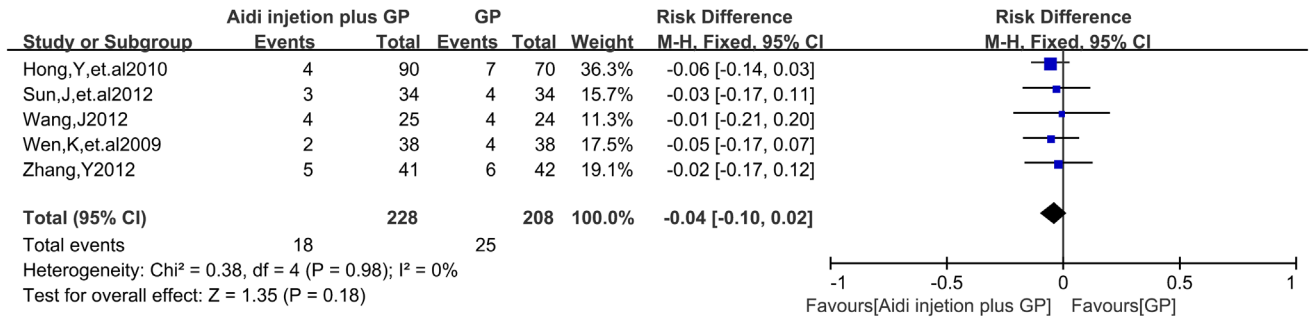

Supplementary Figure S5: The analysis of renal injury between two groups.

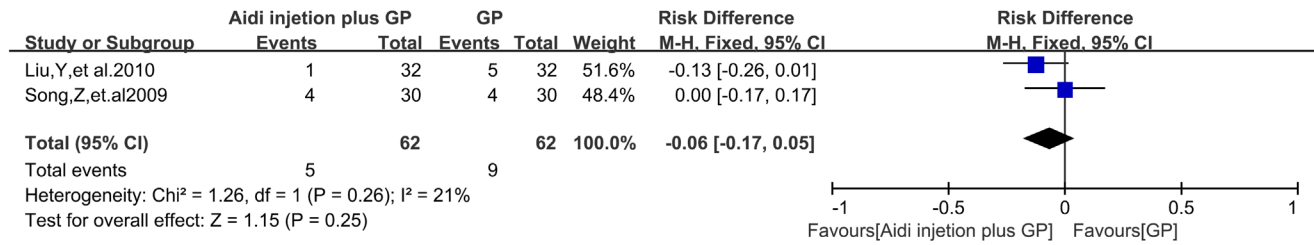

Supplementary Figure S6: The analysis of neurotoxicity between two groups.

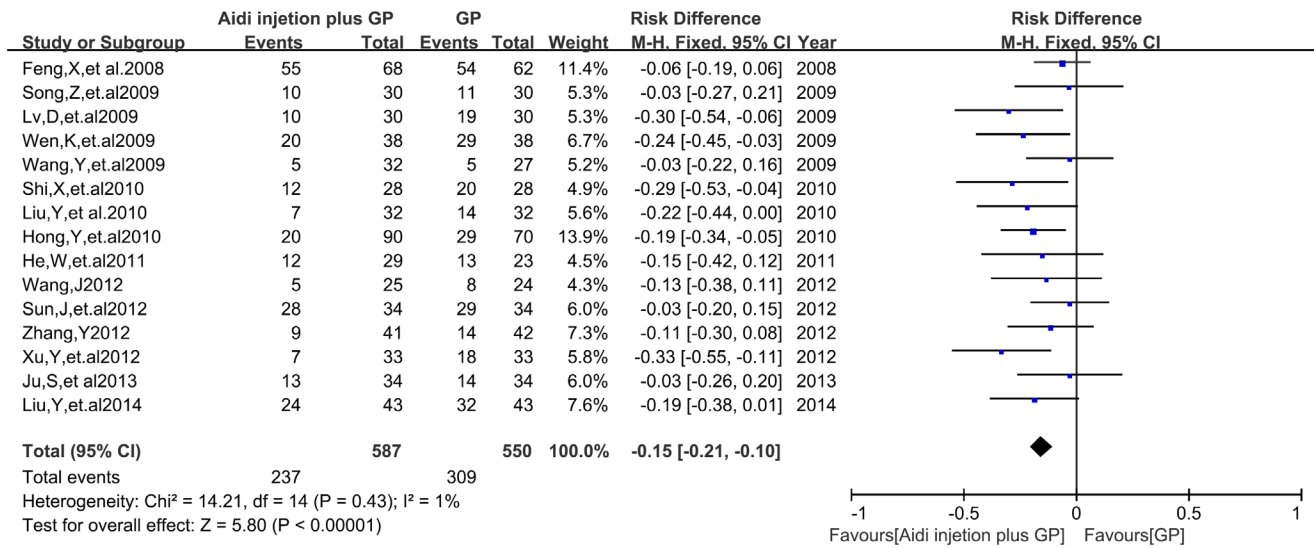

Supplementary Figure S7: The analysis of nausea and vomiting between two groups.
